# Supplementary material
Source: PubMed Central journal article supplement (PMC8168044)
Supplement: NIHMS1705449-supplement-1.pdf [file NIHMS1705449-supplement-1.pdf]

## Supplementary Data

### eResults

Of the mixed allergen reactions, the first patient, approximately 2 years old, consumed lentils and coconut and developed urticaria (ImmunoCAP of 6.5, no skin test performed, no follow-up). The second patient was under 1 year of age and consumed a mixed allergen meal and developed an atopic dermatitis flare. The coconut ImmunoCAP was 54.0, with no skin test performed. With 5 years of follow-up, the patient continues to avoid coconut and has had no

accidental ingestions. The third patient, approximately 2 years old, consumed peanut at the same time as coconut and developed anaphylaxis. Initial coconut ImmunoCAP was 1.0, with no follow-up. The fourth patient, approximately 3 years old, had anaphylaxis after eating walnut and coconut in the same meal (ImmunoCAP, 0.9; skin prick testing result, 4 mm), with food challenge to coconut several years after that was negative (ImmunoCAP, 0.7), but with persistent walnut allergy.

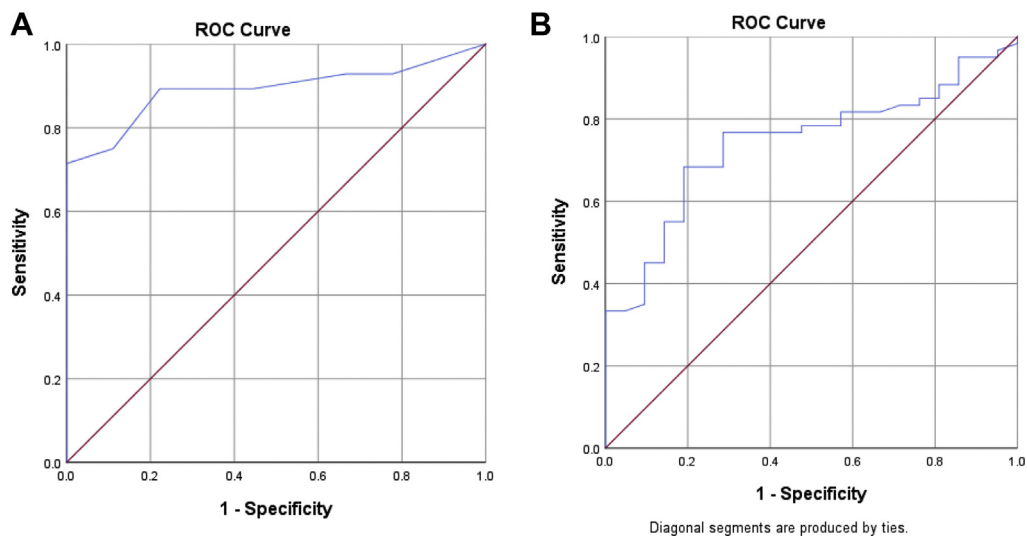

**Figure 1.** A, ROC curve predicting allergy by SPT to coconut. B, ROC curve predicting allergy by sIgE testing to coconut. ROC, receiver operating characteristic; sIgE, specific immunoglobulin E; SPT, skin prick testing.
